# Supplementary material for: Isoprene and monoterpene emissions from alder, aspen and spruce short-rotation forest plantations in the United Kingdom
Source: Copernicus journal article supplement (doi:10.5194/bg-18-2487-2021), 2021-04-20
Supplement: Supplementary file 1 [file bg-18-2487-2021-supplement.pdf]

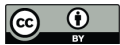

*Supplement of*

## **Isoprene and monoterpene emissions from alder, aspen and spruce short-rotation forest plantations in the United Kingdom**

**Gemma Purser et al.**

*Correspondence to:* Gemma Purser ([gemma.purser1@gmail.com](mailto:gemma.purser1@gmail.com))

The copyright of individual parts of the supplement might differ from the article licence.

**Figure S1 – Meteorological data measured during the chamber sampling campaign from May 2018 until July 2019 at the East Grange SRF trial site. (Occasional missing data due to power failure at the site.) Rainfall data was provided by SEPA for the Saline rainfall monitoring station (56.115°N 3.574°W), approximately 4 km north-east of East Grange.**

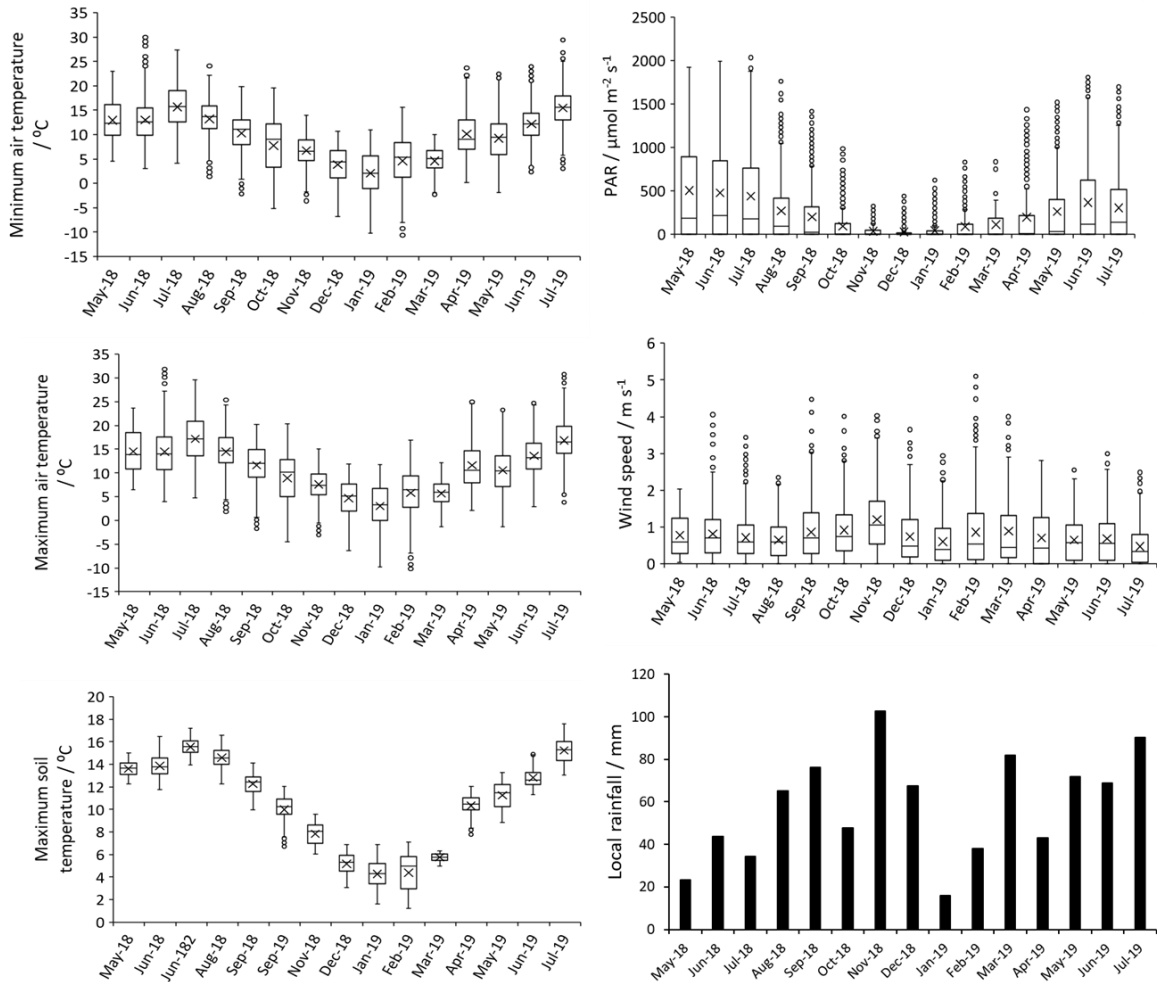

**Figure S2 – Summary data for PAR and air temperature measured at the East Grange field site, Fife, Scotland. Missing data was gap filled with Easter Bush field data, Midlothian, Scotland and the summary data presented here reflects this. The data represented here was used for modelling annual BVOC emissions from Sitka spruce, hybrid aspen and Italian alder using the MEGAN 2.1 model.**

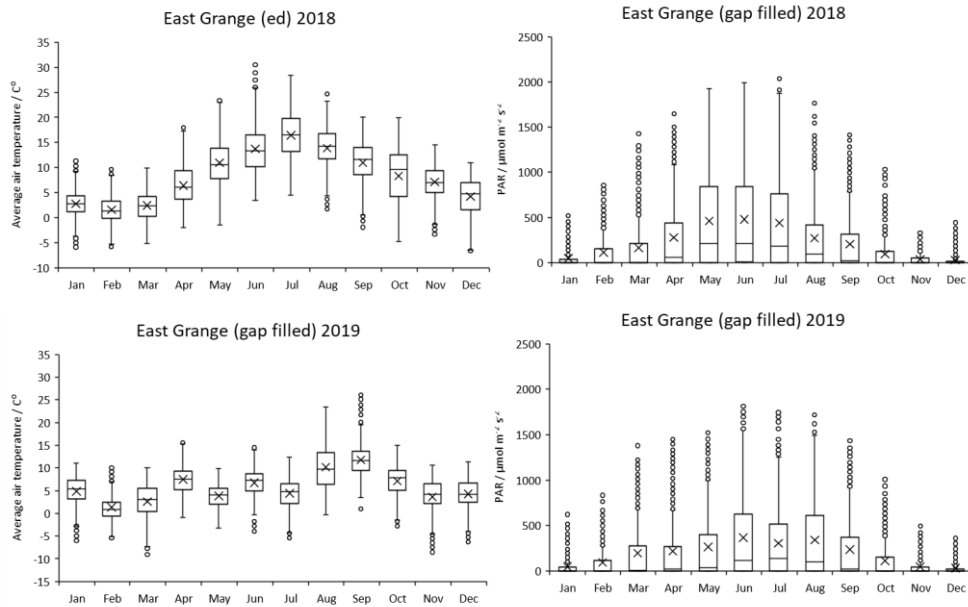

**Figure S3 – Summary data for PAR and air temperature measured at the Alice Holt field site, south England. This data was used for modelling annual BVOC emissions from Sitka spruce, hybrid aspen and Italian alder using the MEGAN 2.1 model.**

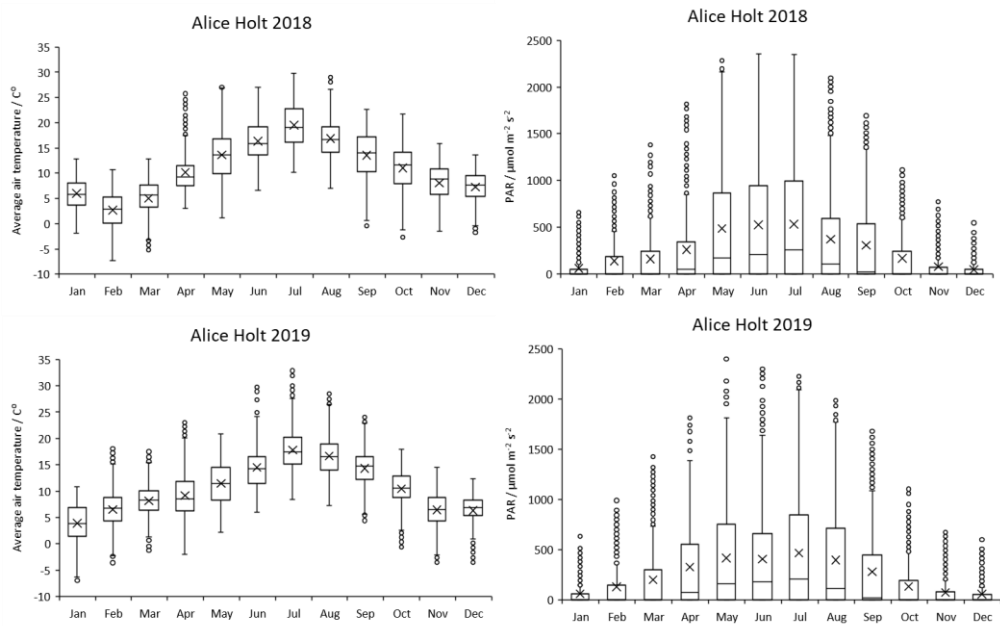

Table S1 – Median seasonal BVOC emissions ( $\mu\text{g C g}^{-1} \text{h}^{-1}$ ) and corresponding interquartile range from branches of Sitka spruce, hybrid aspen and Italian alder in SRF plantations, East Grange, Fife, Scotland.

|             | Species | RH %   | Average PAR | Average temperature ( $^{\circ}\text{C}$ ) | Isoprene | Standardised Isoprene | $\alpha$ -pinene | Standardised $\alpha$ -pinene | $\beta$ -pinene | Standardised $\beta$ -pinene |       |
|-------------|---------|--------|-------------|--------------------------------------------|----------|-----------------------|------------------|-------------------------------|-----------------|------------------------------|-------|
| Spring 2018 | Sitka   | Median | 60          | 580                                        | 17.2     | 0.002                 | 0.018            | 0.000                         | 0.000           | 0.000                        | 0.000 |
|             |         | IQR    | 31          | 981                                        | 10.9     | 0.031                 | 0.484            | 0.025                         | 0.071           | 0.004                        | 0.013 |
|             | Aspen   | Median | 66          | 1032                                       | 30.4     | 3.193                 | 3.171            | -0.003                        | 0.000           | 0.002                        | 0.002 |
|             |         | IQR    | 3           | 262                                        | 2.1      | 0.812                 | 0.388            | 0.002                         | 0.000           | 0.001                        | 0.001 |
|             | Alder   | Median | 82          | 428                                        | 19.7     | 0.010                 | 0.049            | 0.040                         | 0.088           | -0.004                       | 0.000 |
|             |         | IQR    | 5           | 334                                        | 4.3      | 0.012                 | 0.034            | 0.023                         | 0.059           | 0.001                        | 0.000 |
| Summer 2018 | Sitka   | Median | 81          | 2030                                       | 43.3     | 7.812                 | 20.383           | 0.201                         | 0.435           | 0.034                        | 0.059 |
|             |         | IQR    | 20          | 1157                                       | 16.0     | 5.930                 | 14.928           | 0.216                         | 0.300           | 0.034                        | 0.048 |
|             | Aspen   | Median | 68          | 890                                        | 28.7     | 19.626                | 20.441           | 0.030                         | 0.035           | 0.004                        | 0.006 |
|             |         | IQR    | 28          | 595                                        | 8.6      | 26.574                | 12.201           | 0.021                         | 0.053           | 0.004                        | 0.007 |
|             | Alder   | Median | 33          | 1258                                       | 32.0     | 0.034                 | 0.044            | 0.072                         | 0.077           | 0.006                        | 0.006 |
|             |         | IQR    | 15          | 810                                        | 4.3      | 0.096                 | 0.091            | 0.076                         | 0.064           | 0.008                        | 0.005 |
| Winter 2018 | Sitka   | Median | 70          | 425                                        | 17.8     | 0.004                 | 0.029            | 0.000                         | 0.000           | 0.000                        | 0.000 |
|             |         | IQR    | 26          | 118                                        | 7.6      | 0.055                 | 0.252            | 0.028                         | 0.050           | 0.006                        | 0.016 |
|             | Aspen   | Median | -           | -                                          | -        | -                     | -                | -                             | -               | -                            | -     |
|             |         | IQR    | -           | -                                          | -        | -                     | -                | -                             | -               | -                            | -     |
|             | Alder   | Median | 73          | 408                                        | 17.0     | 0.000                 | 0.000            | 0.007                         | 0.027           | 0.002                        | 0.017 |
|             |         | IQR    | 4           | 71                                         | 1.7      | 0.000                 | 0.000            | 0.004                         | 0.102           | 0.003                        | 0.052 |
| Spring 2019 | Sitka   | Median | 47          | 1360                                       | 29.6     | 0.785                 | 1.195            | 0.026                         | 0.023           | 0.013                        | 0.012 |
|             |         | IQR    | 13          | 838                                        | 11.7     | 1.772                 | 1.628            | 0.035                         | 0.033           | 0.017                        | 0.016 |
|             | Aspen   | Median | 52          | 1178                                       | 18.7     | 0.050                 | 0.178            | 0.004                         | 0.014           | 0.000                        | 0.001 |
|             |         | IQR    | 3           | 779                                        | 2.1      | 0.062                 | 0.137            | 0.018                         | 0.035           | 0.000                        | 0.002 |
|             | Alder   | Median | 63          | 1294                                       | 22.3     | 0.010                 | 0.019            | 0.010                         | 0.018           | 0.001                        | 0.001 |
|             |         | IQR    | 26          | 621                                        | 4.4      | 0.031                 | 0.065            | 0.014                         | 0.027           | 0.001                        | 0.002 |
| Summer 2019 | Sitka   | Median | 72          | 1254                                       | 30.9     | 3.369                 | 2.342            | 0.083                         | 0.056           | 0.037                        | 0.033 |
|             |         | IQR    | 23          | 1280                                       | 8.2      | 1.454                 | 8.594            | 0.076                         | 0.224           | 0.016                        | 0.057 |
|             | Aspen   | Median | 78          | 1023                                       | 21.5     | 5.276                 | 20.833           | 0.005                         | 0.009           | 0.001                        | 0.002 |
|             |         | IQR    | 8           | 469                                        | 6.7      | 16.714                | 15.921           | 0.009                         | 0.012           | 0.001                        | 0.001 |
|             | Alder   | Median | 60          | 857                                        | 22.8     | -0.001                | 0.000            | 0.000                         | 0.000           | 0.000                        | 0.000 |
|             |         | IQR    | 24          | 471                                        | 15.5     | 0.027                 | 0.053            | 0.019                         | 0.006           | 0.002                        | 0.001 |

Table S1 continued

|             | Species |        | camphene | Standardised camphene | $\beta$ -myrcene | Standardised $\beta$ -myrcene | $\alpha$ -phellandrene | Standardised $\alpha$ -phellandrene | $\beta$ -phellandrene | Standardised $\beta$ -phellandrene | d-limonene | Standardised d-limonene |       |
|-------------|---------|--------|----------|-----------------------|------------------|-------------------------------|------------------------|-------------------------------------|-----------------------|------------------------------------|------------|-------------------------|-------|
| Spring 2018 | Sitka   | Median | 0.000    | 0.000                 | 0.000            | 0.000                         | 0.000                  | 0                                   | 0.000                 | 0                                  | 0.000      | 0                       |       |
|             |         | IQR    | 0.022    | 0.064                 | 0.044            | 0.130                         | 0.000                  | 0.000                               | 0.000                 | 0.000                              | 0.000      | 0.033                   | 0.098 |
|             | Aspen   | Median | 0.002    | 0.002                 | 0.019            | 0.017                         | 0.000                  | 0.000                               | 0.000                 | 0.000                              | 0.000      | 0.053                   | 0.052 |
|             |         | IQR    | 0.001    | 0.002                 | 0.020            | 0.016                         | 0.000                  | 0.000                               | 0.000                 | 0.000                              | 0.000      | 0.017                   | 0.029 |
|             | Alder   | Median | 0.001    | 0.003                 | 0.022            | 0.052                         | 0.000                  | 0.001                               | 0.000                 | 0.000                              | 0.000      | 0.132                   | 0.334 |
|             |         | IQR    | 0.006    | 0.009                 | 0.007            | 0.012                         | 0.001                  | 0.002                               | 0.000                 | 0.000                              | 0.000      | 0.084                   | 0.388 |
| Summer 2018 | Sitka   | Median | 0.205    | 0.450                 | 8.000            | 13.314                        | 0.033                  | 0.073                               | 0.028                 | 0.061                              | 0.530      | 1.089                   |       |
|             |         | IQR    | 0.190    | 0.234                 | 0.972            | 1.502                         | 0.016                  | 0.025                               | 0.022                 | 0.035                              | 0.555      | 0.843                   |       |
|             | Aspen   | Median | 0.003    | 0.005                 | 0.007            | 0.015                         | 0.000                  | 0.000                               | 0.004                 | 0.009                              | 0.045      | 0.045                   |       |
|             |         | IQR    | 0.008    | 0.012                 | 0.010            | 0.016                         | 0.000                  | 0.000                               | 0.009                 | 0.010                              | 0.064      | 0.035                   |       |
|             | Alder   | Median | 0.015    | 0.052                 | 0.051            | 0.233                         | 0.000                  | 0.000                               | 0.000                 | 0.000                              | 0.000      | 0.037                   | 0.051 |
|             |         | IQR    | 0.071    | 0.061                 | 0.278            | 0.240                         | 0.000                  | 0.000                               | 0.000                 | 0.000                              | 0.000      | 0.146                   | 0.105 |
| Winter 2018 | Sitka   | Median | 0.000    | 0.000                 | 0.003            | 0.011                         | 0.000                  | 0.000                               | 0.000                 | 0.000                              | 0.005      | 0.017                   |       |
|             |         | IQR    | 0.011    | 0.017                 | 0.104            | 0.300                         | 0.001                  | 0.001                               | 0.000                 | 0.001                              | 0.060      | 0.178                   |       |
|             | Aspen   | Median | -        | -                     | -                | -                             | -                      | -                                   | -                     | -                                  | -          | -                       |       |
|             |         | IQR    | -        | -                     | -                | -                             | -                      | -                                   | -                     | -                                  | -          | -                       |       |
|             | Alder   | Median | 0.000    | 0.000                 | 0.001            | 0.010                         | 0.000                  | 0.002                               | 0.000                 | 0.000                              | 0.000      | 0.025                   | 0.196 |
|             |         | IQR    | 0.000    | 0.000                 | 0.002            | 0.003                         | 0.000                  | 0.001                               | 0.000                 | 0.000                              | 0.000      | 0.018                   | 0.369 |
| Spring 2019 | Sitka   | Median | 0.010    | 0.009                 | 0.916            | 0.834                         | 0.002                  | 0.003                               | 0.006                 | 0.006                              | 0.430      | 0.392                   |       |
|             |         | IQR    | 0.012    | 0.010                 | 1.188            | 1.340                         | 0.006                  | 0.006                               | 0.009                 | 0.008                              | 0.524      | 0.476                   |       |
|             | Aspen   | Median | 0.000    | 0.000                 | 0.000            | 0.000                         | 0.000                  | 0.000                               | 0.000                 | 0.000                              | 0.000      | 0.000                   |       |
|             |         | IQR    | 0.000    | 0.000                 | 0.000            | 0.001                         | 0.000                  | 0.000                               | 0.000                 | 0.000                              | 0.004      | 0.009                   |       |
|             | Alder   | Median | 0.000    | 0.000                 | 0.001            | 0.001                         | 0.000                  | 0.000                               | 0.000                 | 0.001                              | 0.013      | 0.018                   |       |
|             |         | IQR    | 0.000    | 0.000                 | 0.001            | 0.001                         | 0.000                  | 0.000                               | 0.000                 | 0.001                              | 0.016      | 0.033                   |       |
| Summer 2019 | Sitka   | Median | 0.005    | 0.005                 | 1.046            | 0.786                         | 0.012                  | 0.012                               | 0.020                 | 0.013                              | 0.719      | 0.742                   |       |
|             |         | IQR    | 0.052    | 0.111                 | 0.756            | 0.383                         | 0.009                  | 0.008                               | 0.016                 | 0.009                              | 0.233      | 0.874                   |       |
|             | Aspen   | Median | 0.000    | 0.000                 | 0.000            | 0.001                         | 0.000                  | 0.000                               | 0.001                 | 0.001                              | 0.009      | 0.023                   |       |
|             |         | IQR    | 0.001    | 0.001                 | 0.001            | 0.001                         | 0.000                  | 0.000                               | 0.011                 | 0.013                              | 0.015      | 0.016                   |       |
|             | Alder   | Median | 0.000    | 0.000                 | 0.000            | 0.000                         | 0.000                  | 0.000                               | 0.000                 | 0.000                              | 0.004      | 0.005                   |       |
|             |         | IQR    | 0.001    | 0.000                 | 0.000            | 0.001                         | 0.000                  | 0.000                               | 0.006                 | 0.000                              | 0.004      | 0.012                   |       |

Table S1 continued

|             | Species |        | eucalyptol | Standardised eucalyptol | Carene | Standardised carene | linalool | Standardised linalool | $\gamma$ -terpinene | Standardised $\gamma$ -terpinene | Total MT | Standardised Total MT |
|-------------|---------|--------|------------|-------------------------|--------|---------------------|----------|-----------------------|---------------------|----------------------------------|----------|-----------------------|
| Spring 2018 | Sitka   | Median | 0.000      | 0                       | 0.000  | 0                   | 0.000    | 0                     | 0.000               | 0                                | 0.000    | 0.000                 |
|             |         | IQR    | 0.001      | 0.004                   | 0.000  | 0.000               | 0.000    | 0.000                 | 0.000               | 0.000                            | 0.127    | 0.436                 |
|             | Aspen   | Median | 0.008      | 0.008                   | -0.003 | 0.000               | 0.000    | 0.000                 | 0.000               | 0.000                            | 0.065    | 0.074                 |
|             |         | IQR    | 0.004      | 0.003                   | 0.001  | 0.000               | 0.000    | 0.000                 | 0.000               | 0.000                            | 0.014    | 0.016                 |
|             | Alder   | Median | 0.005      | 0.010                   | 0.036  | 0.089               | 0.000    | 0.000                 | 0.000               | 0.000                            | 0.232    | 0.584                 |
|             |         | IQR    | 0.001      | 0.005                   | 0.006  | 0.044               | 0.000    | 0.000                 | 0.000               | 0.000                            | 0.085    | 0.531                 |
| Summer 2018 | Sitka   | Median | 0.072      | 0.158                   | 0.011  | 0.019               | 0.000    | 0.000                 | 0.000               | 0.000                            | 9.025    | 15.021                |
|             |         | IQR    | 0.193      | 0.097                   | 0.016  | 0.014               | 0.000    | 0.000                 | 0.000               | 0.000                            | 2.270    | 3.136                 |
|             | Aspen   | Median | 0.008      | 0.012                   | 0.013  | 0.020               | 0.000    | 0.000                 | 0.000               | 0.000                            | 0.107    | 0.157                 |
|             |         | IQR    | 0.013      | 0.025                   | 0.018  | 0.011               | 0.000    | 0.000                 | 0.000               | 0.000                            | 0.131    | 0.101                 |
|             | Alder   | Median | 0.016      | 0.021                   | 0.025  | 0.031               | 0.000    | 0.000                 | 0.000               | 0.000                            | 0.387    | 0.435                 |
|             |         | IQR    | 0.015      | 0.009                   | 0.059  | 0.058               | 0.000    | 0.000                 | 0.000               | 0.000                            | 0.563    | 0.483                 |
| Winter 2018 | Sitka   | Median | 0.000      | 0.000                   | 0.000  | 0.001               | 0.000    | 0.000                 | 0.000               | 0.000                            | 0.008    | 0.025                 |
|             |         | IQR    | 0.022      | 0.038                   | 0.003  | 0.009               | 0.001    | 0.001                 | 0.000               | 0.000                            | 0.258    | 0.741                 |
|             | Aspen   | Median | -          | -                       | -      | -                   | -        | -                     | -                   | -                                | -        | -                     |
|             |         | IQR    | -          | -                       | -      | -                   | -        | -                     | -                   | -                                | -        | -                     |
|             | Alder   | Median | 0.001      | 0.007                   | 0.006  | 0.037               | 0.000    | 0.002                 | 0.000               | 0.001                            | 0.037    | 0.342                 |
|             |         | IQR    | 0.001      | 0.012                   | 0.004  | 0.098               | 0.000    | 0.003                 | 0.000               | 0.002                            | 0.021    | 0.658                 |
| Spring 2019 | Sitka   | Median | 0.000      | 0.000                   | 0.006  | 0.007               | 0.000    | 0.000                 | 0.000               | 0.000                            | 1.412    | 1.286                 |
|             |         | IQR    | 0.022      | 0.044                   | 0.011  | 0.011               | 0.000    | 0.000                 | 0.000               | 0.000                            | 2.391    | 2.602                 |
|             | Aspen   | Median | 0.000      | 0.000                   | 0.001  | 0.002               | 0.000    | 0.000                 | 0.000               | 0.000                            | 0.005    | 0.020                 |
|             |         | IQR    | 0.000      | 0.000                   | 0.001  | 0.002               | 0.007    | 0.018                 | 0.000               | 0.000                            | 0.071    | 0.137                 |
|             | Alder   | Median | 0.000      | 0.000                   | 0.005  | 0.010               | 0.001    | 0.001                 | 0.000               | 0.000                            | 0.035    | 0.051                 |
|             |         | IQR    | 0.000      | 0.000                   | 0.008  | 0.009               | 0.002    | 0.004                 | 0.000               | 0.000                            | 0.038    | 0.085                 |
| Summer 2019 | Sitka   | Median | 0.073      | 0.072                   | 0.008  | 0.011               | 0.005    | 0.005                 | 0.003               | 0.003                            | 2.302    | 2.057                 |
|             |         | IQR    | 0.136      | 0.048                   | 0.023  | 0.009               | 0.010    | 0.004                 | 0.005               | 0.002                            | 1.160    | 1.460                 |
|             | Aspen   | Median | 0.000      | 0.000                   | 0.003  | 0.007               | 0.004    | 0.011                 | 0.000               | 0.000                            | 0.023    | 0.049                 |
|             |         | IQR    | 0.006      | 0.007                   | 0.006  | 0.008               | 0.037    | 0.042                 | 0.000               | 0.000                            | 0.081    | 0.094                 |
|             | Alder   | Median | 0.000      | 0.000                   | 0.000  | 0.000               | 0.000    | 0.000                 | 0.000               | 0.000                            | 0.004    | 0.014                 |
|             |         | IQR    | 0.000      | 0.000                   | 0.009  | 0.004               | 0.000    | 0.000                 | 0.000               | 0.000                            | 0.024    | 0.017                 |
